# Supplementary material for: Cu(II)-Loaded Polydopamine-Coated Urchin-like Titanate Microspheres as a High-Performance IMAC Adsorbent for Hemoglobin Separation
Source: MDPI journal article supplement (doi:10.3390/molecules29071656), 2024-04-07
Supplement: s1 [file s1]

Supporting information

# Cu(II)-Loaded Polydopamine-Coated Urchin-Like Titanate Microspheres as a High-Performance IMAC Adsorbent for Hemoglobin Separation

*Qian Zhang*<sup>1, 2, †</sup>, *Linlin Hu*<sup>1, 2, †</sup>, *Jianyu Yang*<sup>3</sup>, *Pengfei Guo*<sup>1, 2, \*</sup>, *Jinhong Wang*<sup>1, \*</sup>  
and *Weifen Zhang*<sup>1, 2</sup>

<sup>a</sup> School of Pharmacy, Shandong Second Medical University, Weifang, 261053, China;

zhang\_qian0424@163.com (Q.Z.); hull@sdsu.edu.cn (L.H.);

zhangwf@sdsu.edu.cn (W.Z.)

<sup>b</sup> Shandong Engineering Research Center for Smart Materials and Regenerative

Medicine, Weifang, 261053, China

<sup>c</sup> School of Materials Science and Engineering, Suzhou University of Science and

Technology, Suzhou, 215009, China; jianyuyang@usts.edu.cn

Correspondence: guopf@sdsu.edu.cn (P.G.); wfmwqh@sdsu.edu.cn (J.W.)

† These authors contributed equally to this work.

Figure S1. TEM element mapping of Cu-PDA-UTMS.

Figure S2. SEM images of Na-TNT (a, b), Na-UTMS (c, d) and H-UTMS (e, f).

Figure S3. Photographs of H-UTMS (a), PDA-UTMS(b) and Cu-PDA-UTMS(c).

Figure S4. The circular dichroism (CD) of standard hemoglobin and hemoglobin solution after adsorption by the Cu-PDA-UTMS and recovery in 0.1% CTAB solution (The final hemoglobin solution is required to remove the CTAB molecule through dialysis).

Table S1. Elements content of H-UTMS, PDA-UTMS and Cu-PDA-UTMS by SEM/EDS

.

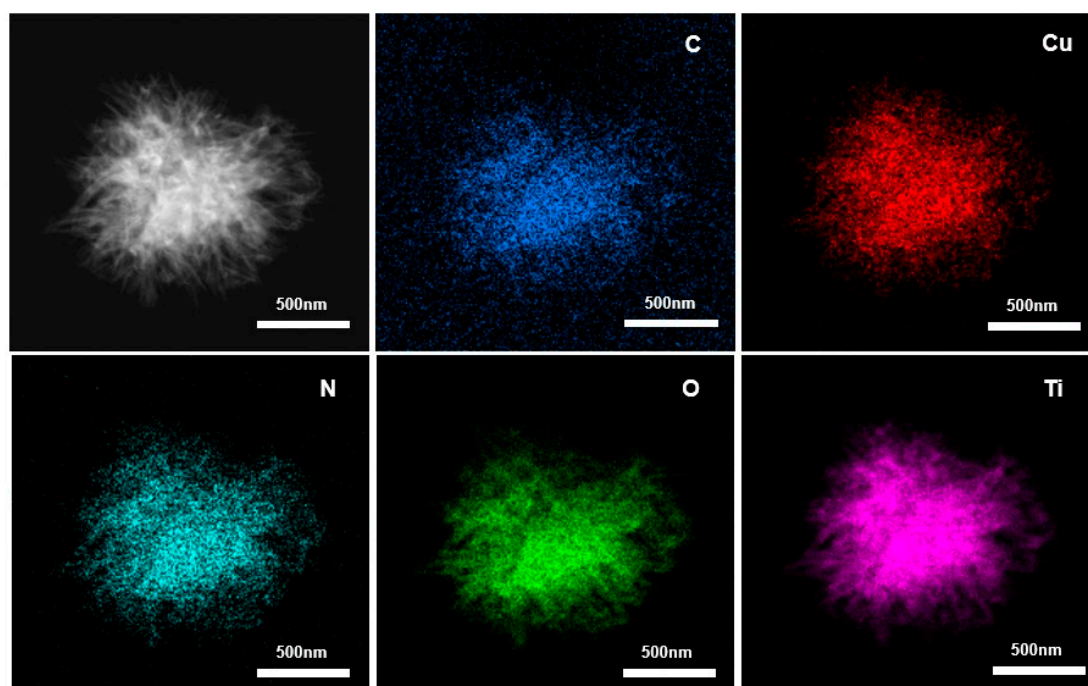

**Figure S1.** TEM element mapping of Cu-PDA-UTMS.

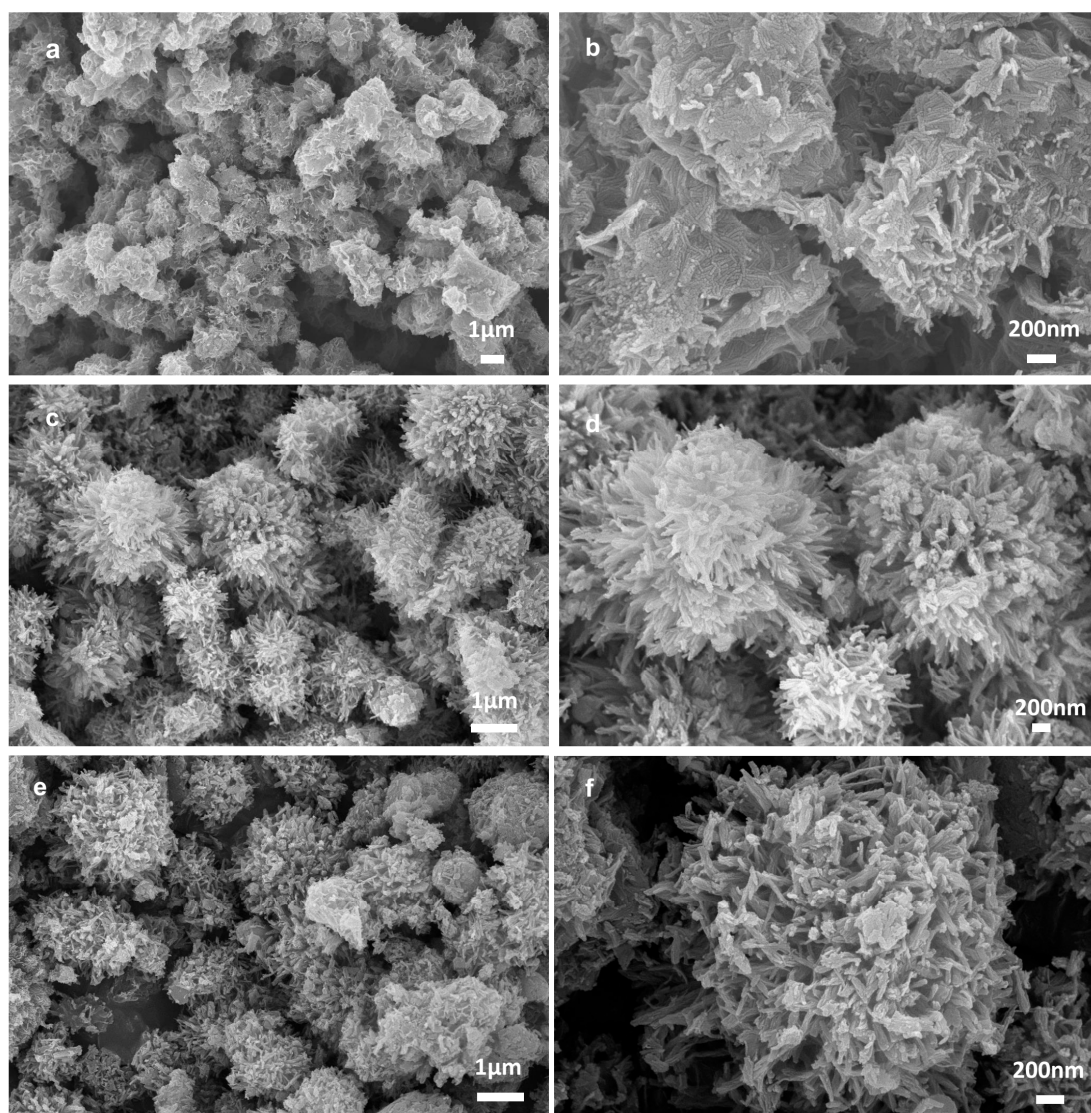

**Figure S2.** SEM images of Na-TNT (a, b), Na-UTMS (c, d) and H-UTMS (e, f).

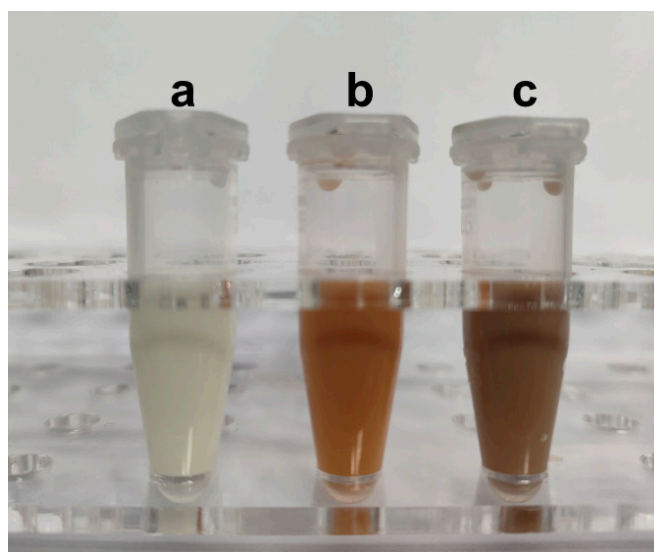

**Figure S3.** Photographs of H-UTMS (a), PDA-UTMS(b) and Cu-PDA-UTMS(c).

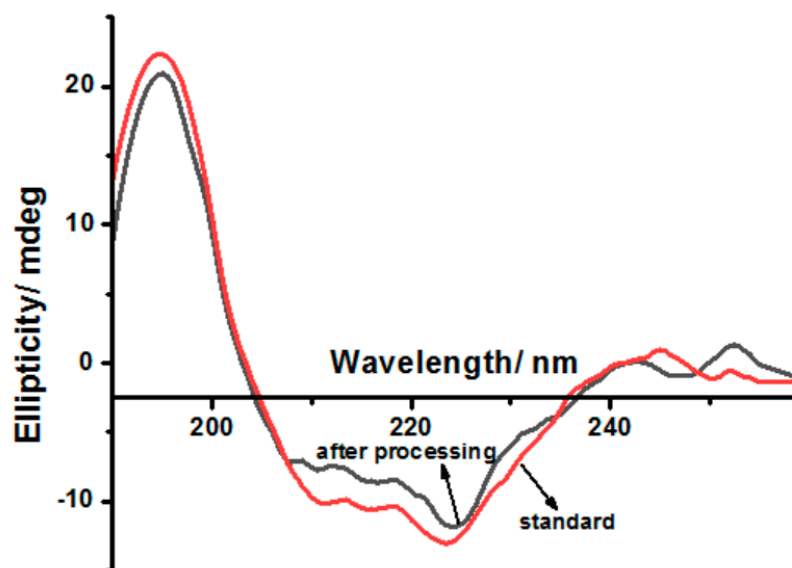

**Figure S4.** The circular dichroism (CD) of standard hemoglobin and hemoglobin solution after adsorption by the Cu-PDA-UTMS and recovery in 0.1% CTAB solution (The final hemoglobin solution is required to remove the CTAB molecule through dialysis).

**Table S1.** Elements content of H-UTMS, PDA-UTMS and Cu-PDA-UTMS by SEM/EDS

| Element | H-UTMS(Wt%) | PDA-UTMS(Wt%) | Cu-PDA-UTMS(Wt%) |
|---------|-------------|---------------|------------------|
| Ti      | 35.04       | 19.98         | 11.70            |
| C       | -           | 31.83         | 41.53            |
| N       | -           | 0.00          | 0.00             |
| O       | 64.96       | 48.19         | 45.26            |
| Cu      | -           | -             | 1.51             |
| Total   | 100.00      | 100.00        | 100.00           |
